# Supplementary material for: Photodynamic Priming Improves the Anti-Migratory Activity of Prostaglandin E Receptor 4 Antagonist in Cancer Cells In Vitro
Source: Cancers (Basel). 2021 Oct 20;13(21):5259. doi: 10.3390/cancers13215259 (PMC8582354; doi:10.3390/cancers13215259)
Supplement: Supplementary file 1 [file cancers-13-05259-s001.zip › cancers-1388556-Supplementary.pdf]

## Supplementary Materials

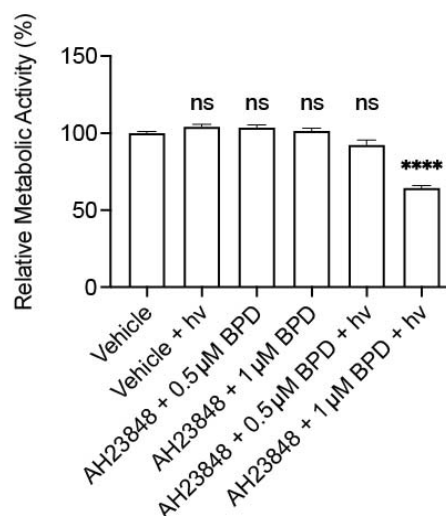

**Figure S1.** Quantification of cellular metabolic activity. OVCAR-5 cells were treated for 24 hours with the indicated agents (AH23848 dose was fixed at 40 μM), then the light activated groups received 690 nm light (0.1 J/cm<sup>2</sup>, 10 mW/cm<sup>2</sup>). Metabolic activity was quantified 24 hours later using the MTT assay. Data is normalized to the vehicle (DMSO) control, then statistical analysis was performed using a one-way ANOVA and post hoc Tukey's test. Error bars represent the standard error of the mean. \*\*\*\* $p \leq 0.0001$ ; ns: nonsignificant.

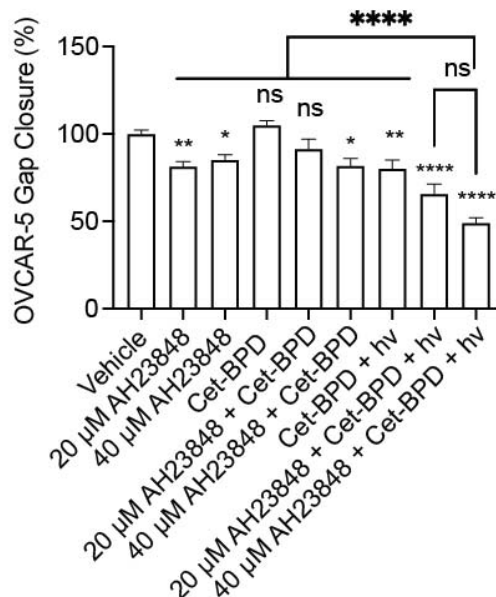

**Figure S2.** Gap closure analysis at 20 μM and 40 μM AH23848. OVCAR-5 cells were treated with the indicated agents for 24 hours, then light-activated at 690 nm (0.1 J/cm<sup>2</sup>, 10 mW/cm<sup>2</sup>). Following irradiation, cells were scratched for gap closure analysis and normalized to the vehicle (DMSO) control. Statistical analysis was performed using a one-way ANOVA and post hoc Tukey's test. Error bars represent the standard error of the mean. \* $p \leq 0.05$ ; \*\* $p \leq 0.01$ ; \*\*\*\* $p \leq 0.0001$ ; ns: nonsignificant.

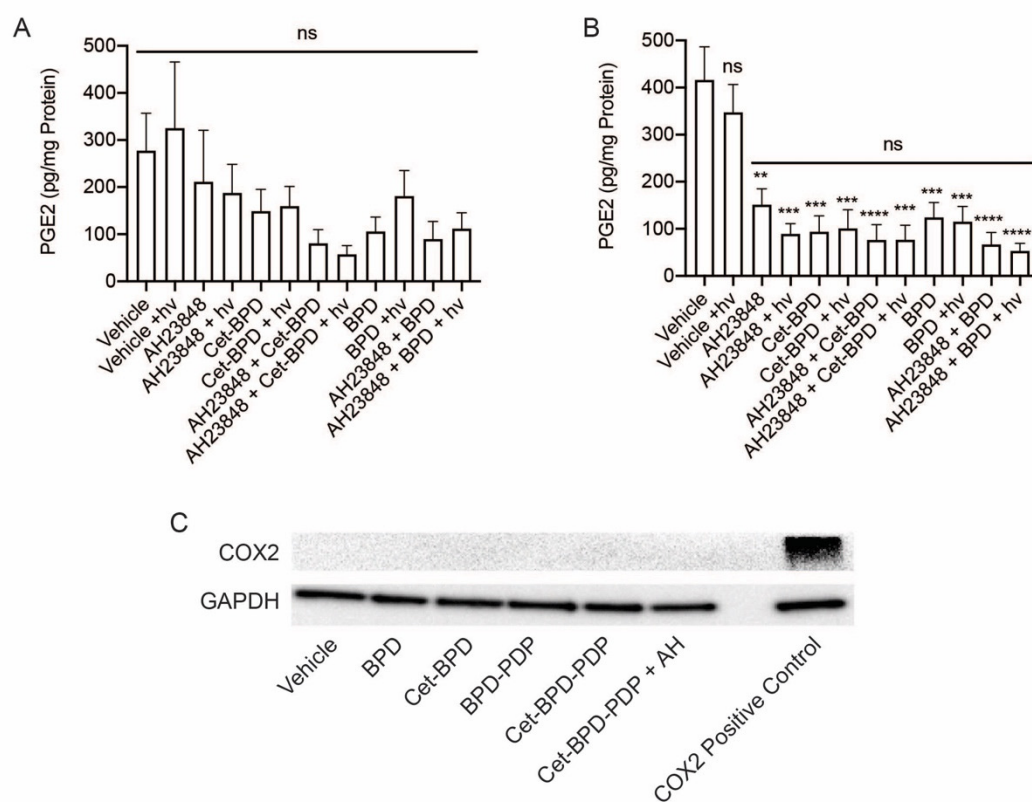

**Figure S3.** Investigation of PGE2 release and COX-2 regulation in CAOV3 cells. CAOV3 cells were treated with serum-free media supplemented with the indicated agents, and light-activated 24 hours later (0.1 J/cm<sup>2</sup>, 10 mW/cm<sup>2</sup>). Supernatants were collected at **(A)** 1 and **(B)** 4 hours post-PDP and assayed for PGE2 using the Prostaglandin E<sub>2</sub> ELISA Kit (514010, Cayman) **(C)** Lysates were collected at 24 hours post-PDP and probed for COX-2. GAPDH was included as a loading control. Statistical analysis was performed using a one-way ANOVA and post hoc Tukey's test. Error bars represent the standard error of the mean. \*\* $p \leq 0.01$ ; \*\*\* $p \leq 0.001$ ; \*\*\*\* $p \leq 0.0001$ ; ns: nonsignificant. Original western blot images (Supplementary Figure S6).

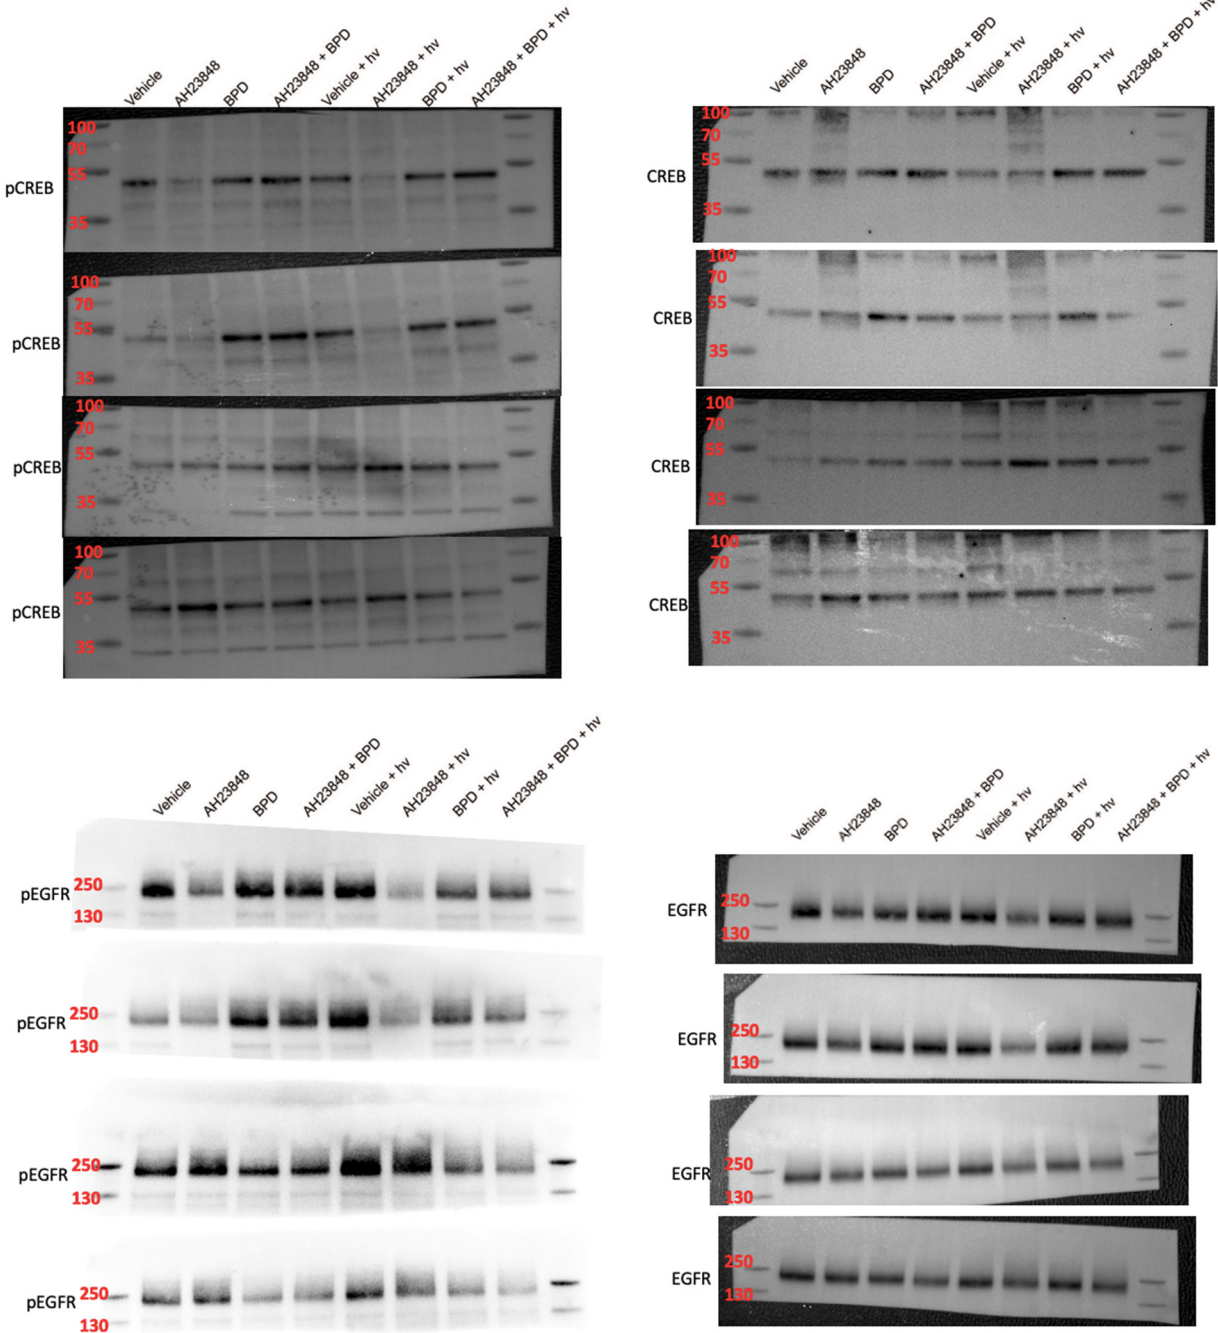

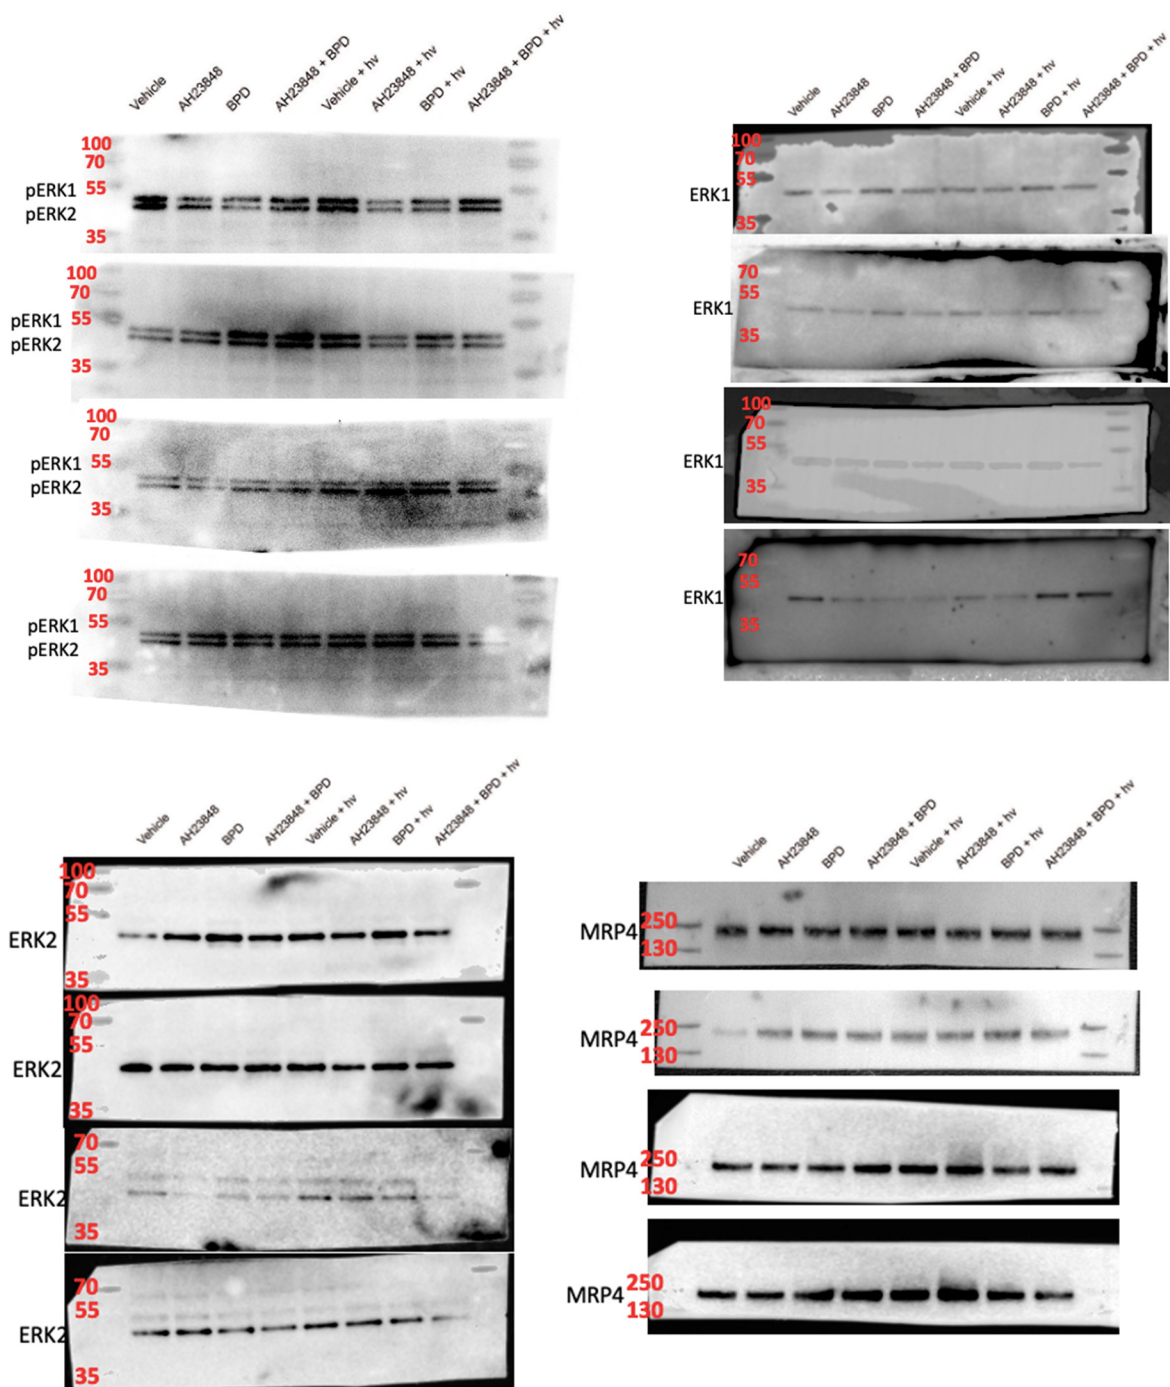

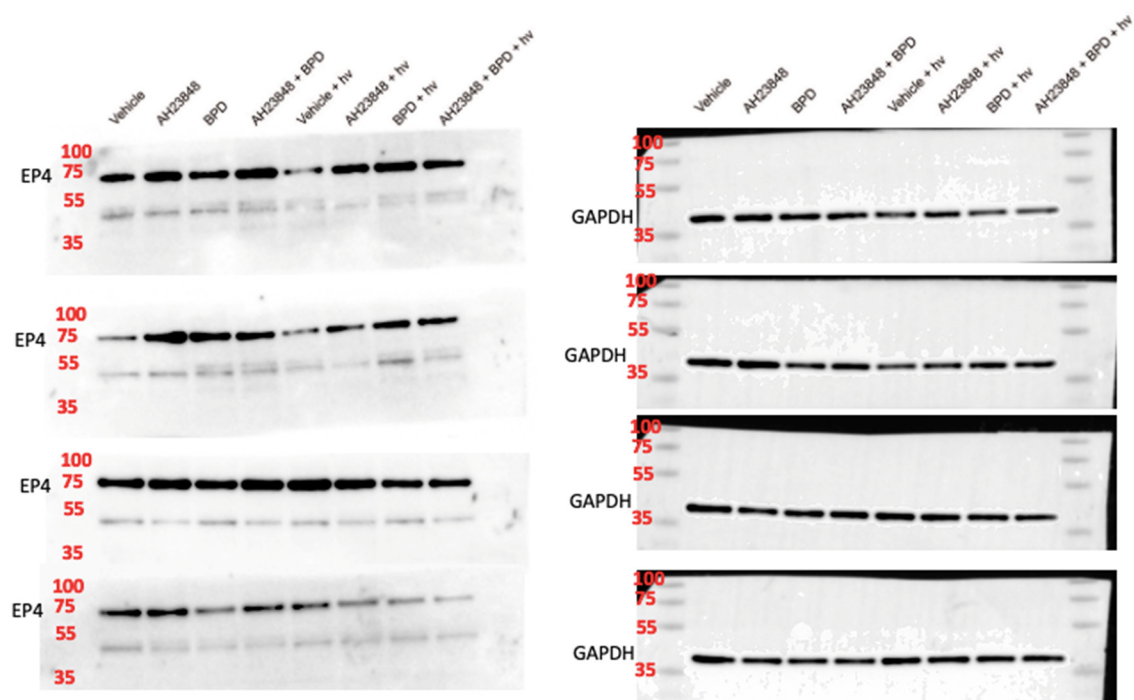

Figure S4. Figure 2 Original western blot images.

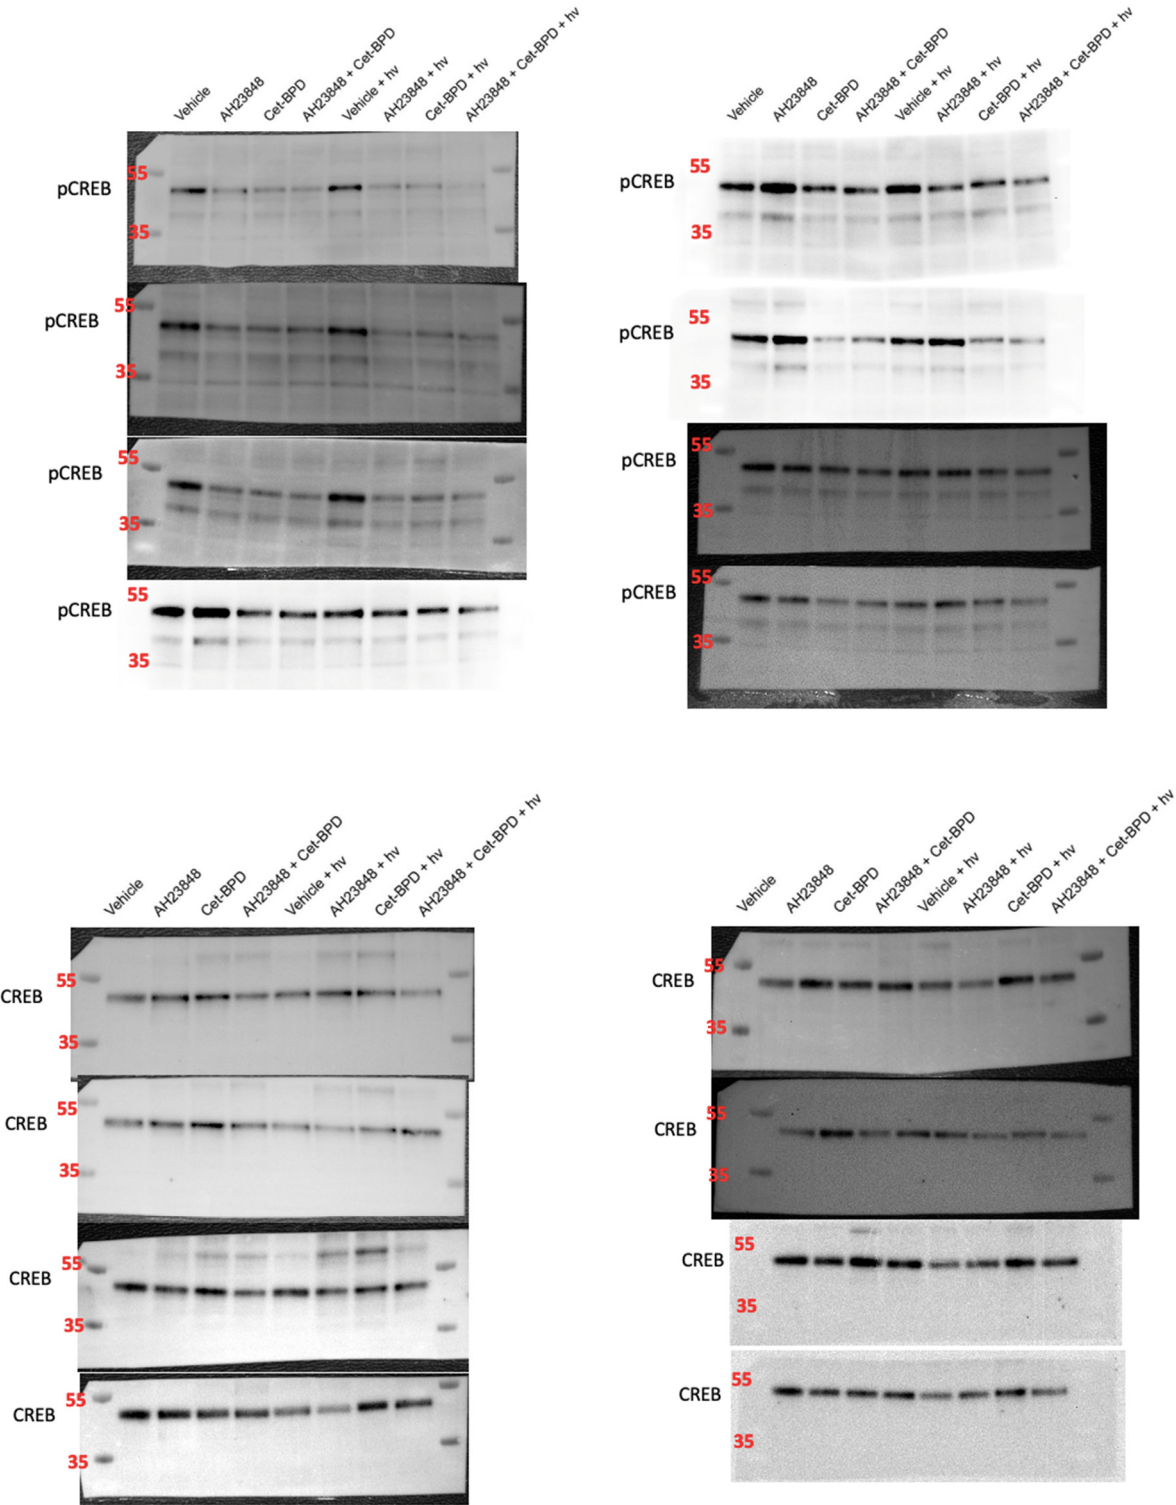

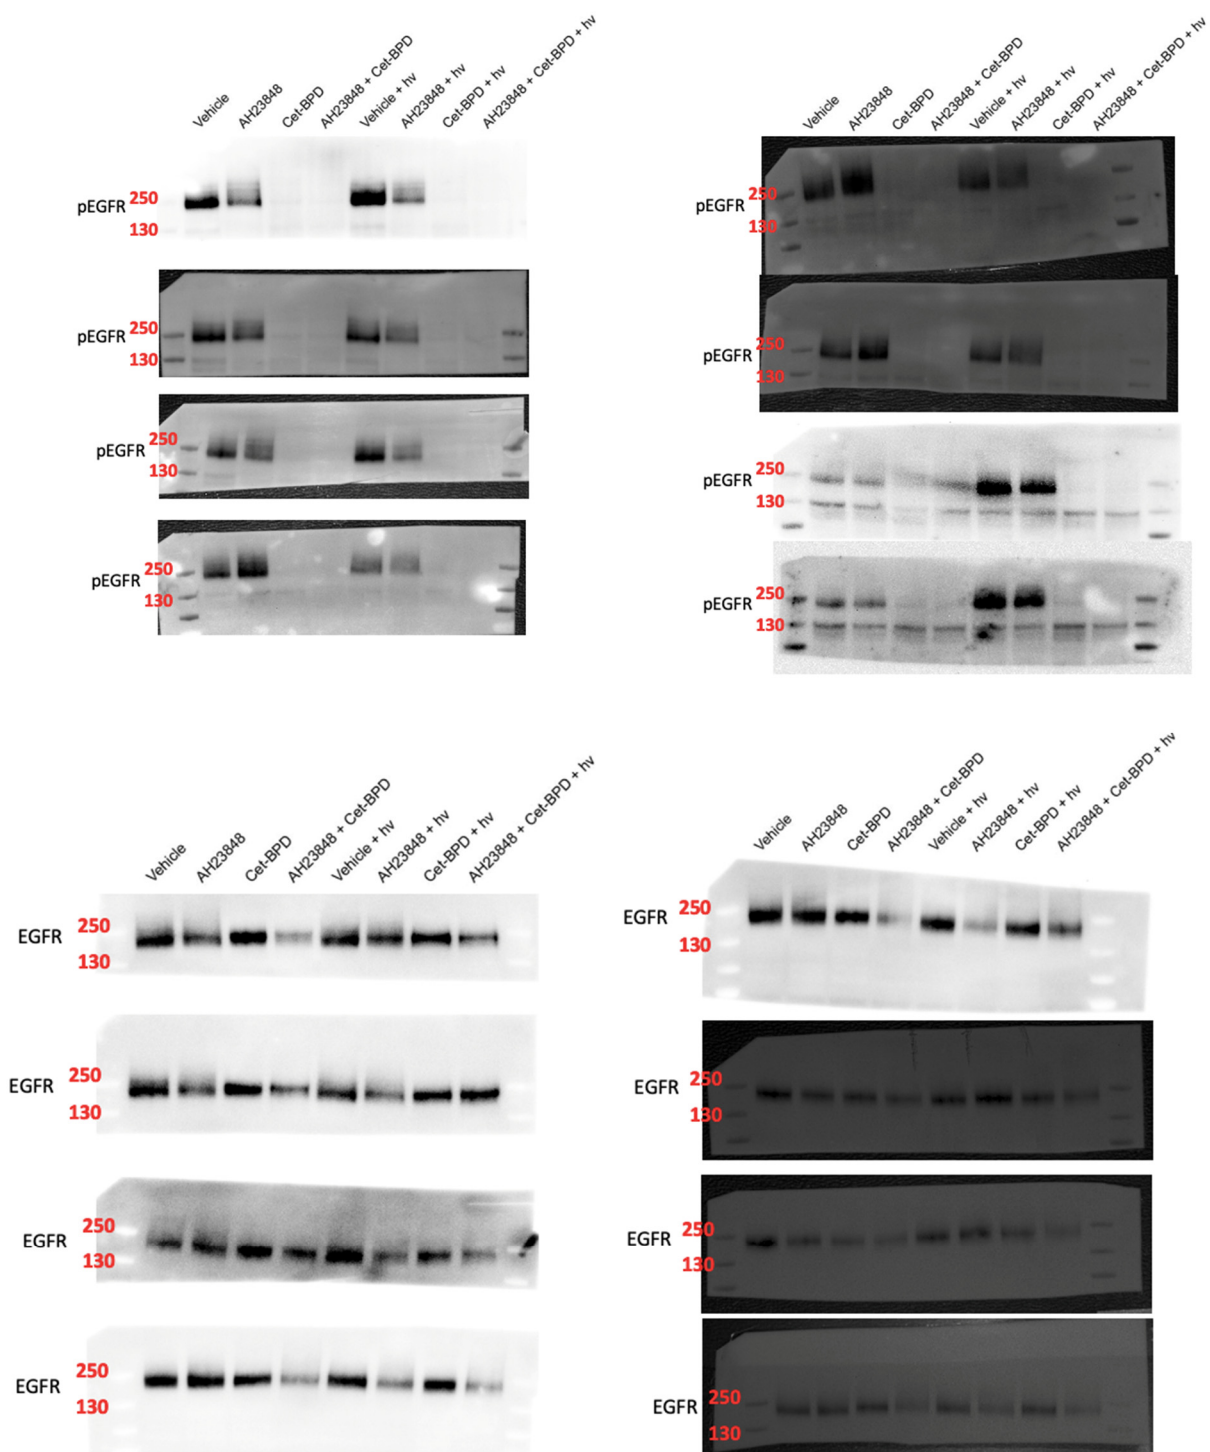

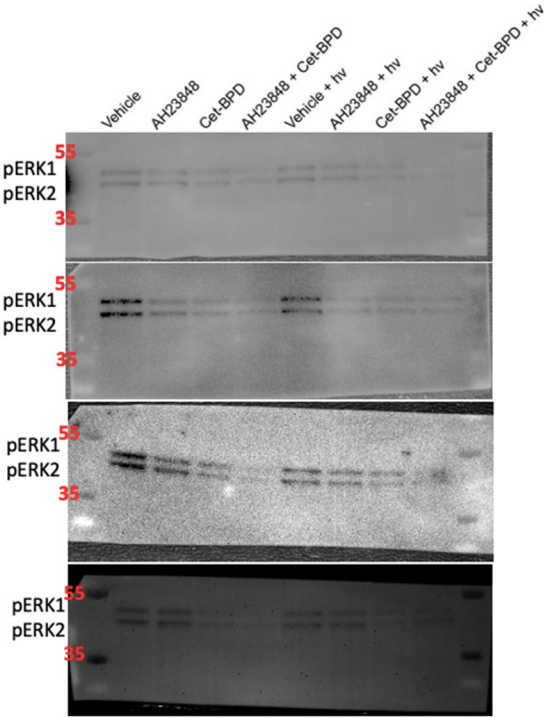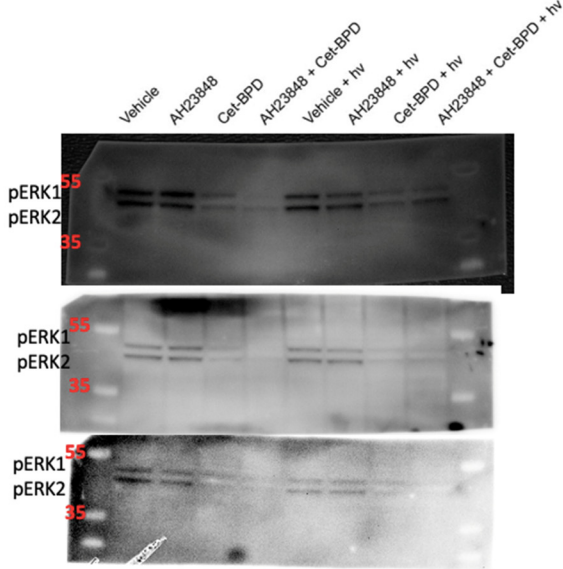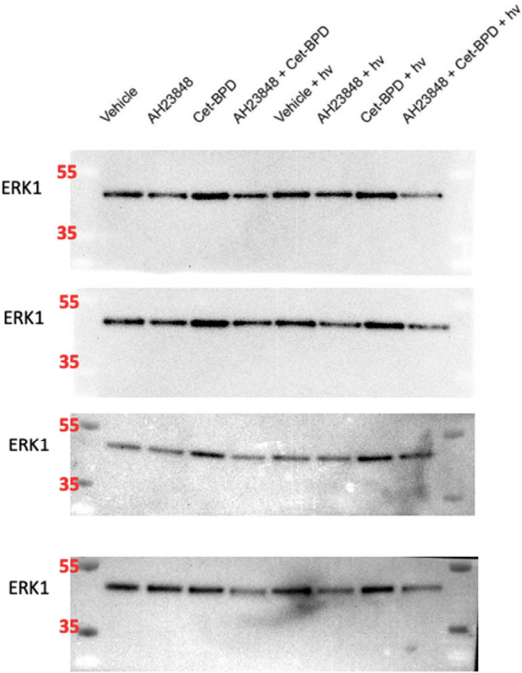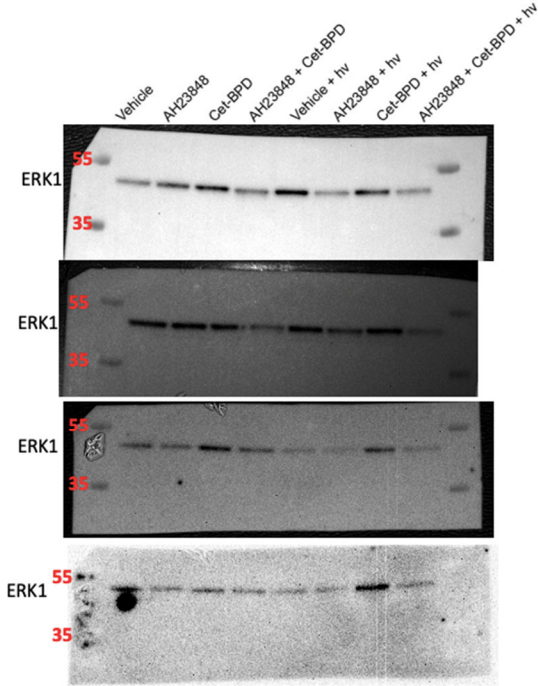

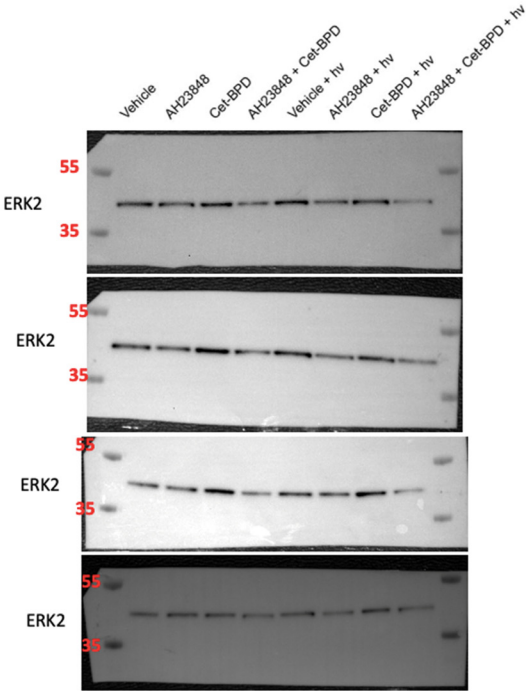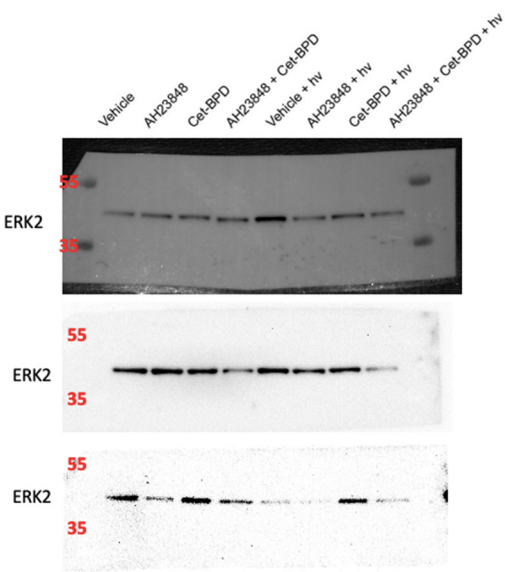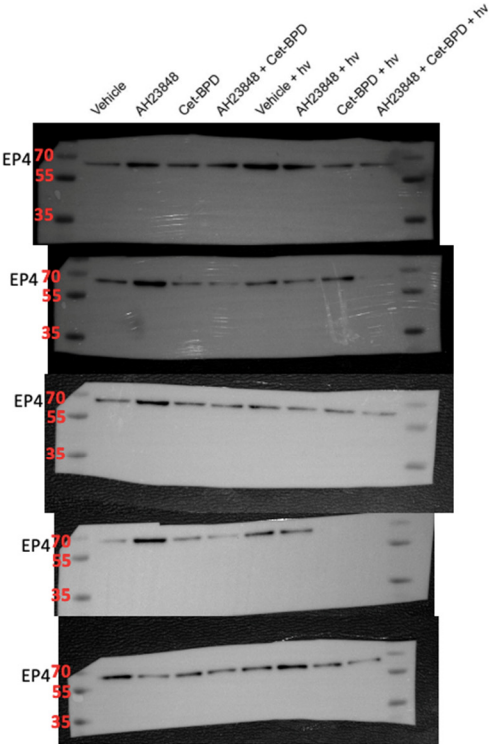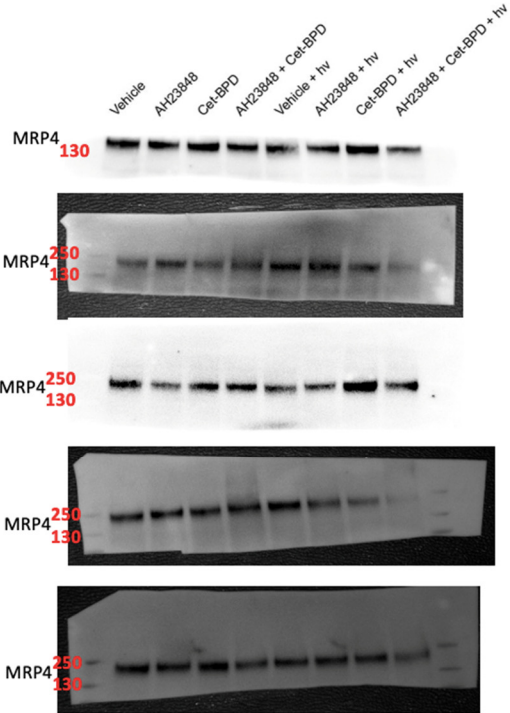

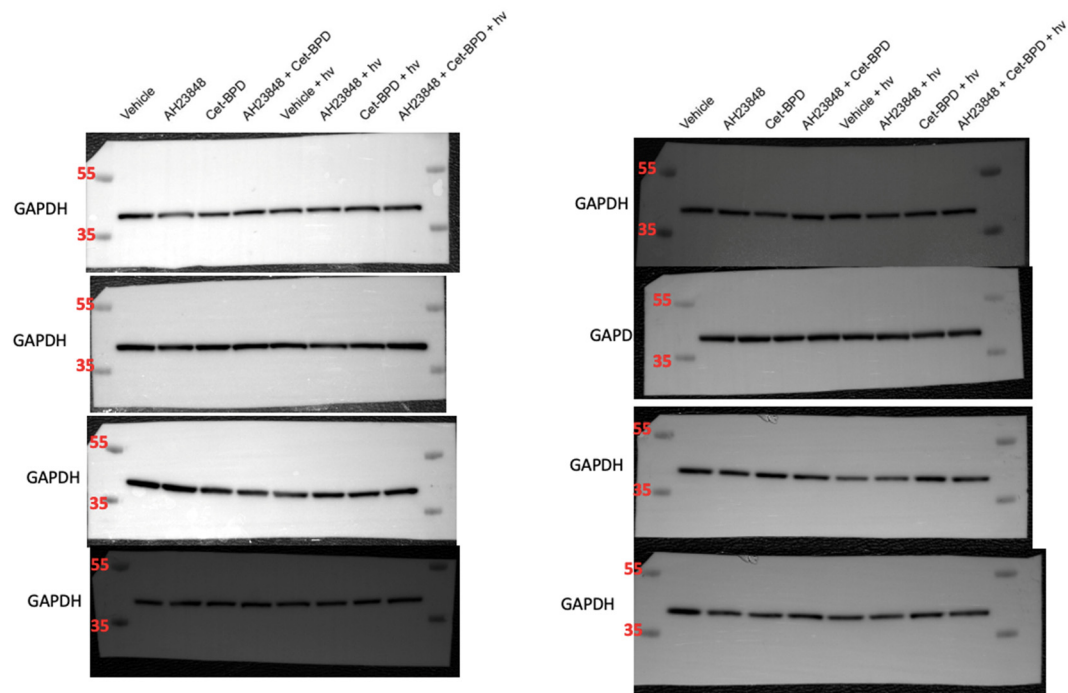

Figure S5. Figure 5 Original western blot images.

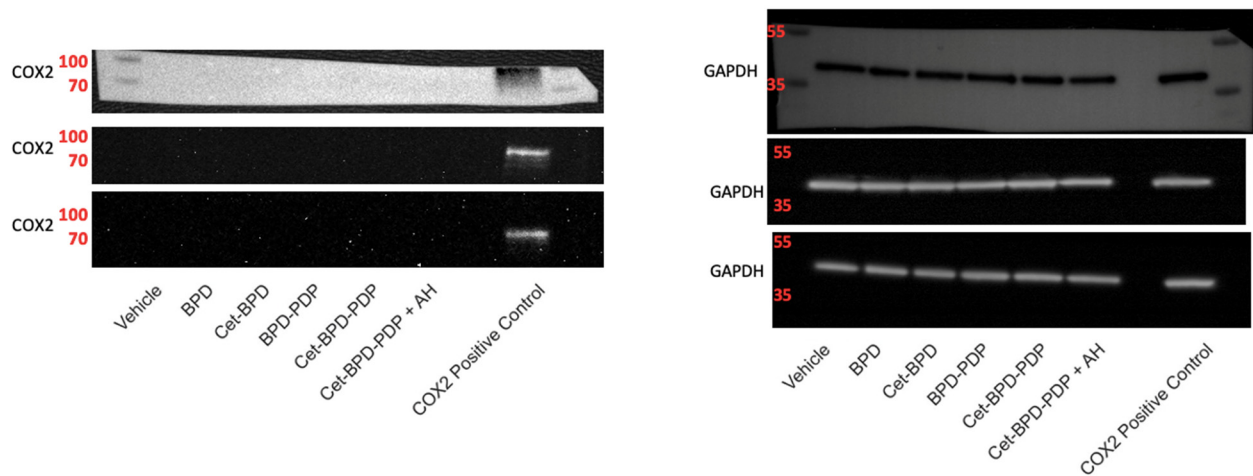

Figure S6. Figure S3 Original western blot images.
